# Supplementary material
Source: PubMed Central journal article supplement (PMC1838515)
Supplement: pnas_0609139104_1.pdf [file pnas_0609139104_1.pdf]

Table 3. Validation of the inverse relationship between IGFBP-2 expression and the PTEN mutation in tumors

**Samples in microarray analysis**

| Prostate | IGFBP2 expression |         | PTEN status | GBM | IGFBP2 expression |         | PTEN status |
|----------|-------------------|---------|-------------|-----|-------------------|---------|-------------|
|          | RNA               | Protein |             |     | RNA               | Protein |             |
| 3        | 354               | no      | Wild type   | 10  | 14942             | no      | Wild type   |
| 4        | 1807              | no      | Wild type   | 68  | 655               | no      | Wild type   |
| 9        | 1402              | no      | Wild type   | 317 | 3749              | no      | Wild type   |
| 10       | 1131              | no      | Wild type   | 476 | 16483             | no      | Wild type   |
| 5        | 3364              | +       | Mutant      | 494 | 10699             | no      | Wild type   |
| 6        | 10861             | +       | Mutant      | 502 | 19414             | low     | Wild type   |
| 11       | 7770              | +++     | Mutant      | 580 | 9131              | no      | Wild type   |
| 12       | 11237             | +++     | Mutant      | 46  | 37265             | +       | Mutant      |
| 58       | 11063             | ++      | Mutant      | 110 | 22298             | +++     | Mutant      |
| 62       | 17217             | ++      | Mutant      | 188 | 48838             | +++     | Mutant      |
| 64       | 8378              | ++      | Mutant      | 203 | 38755             | +       | Mutant      |
| 65       | 4695              | ++      | Mutant      | 263 | 35151             | ++      | Mutant      |
|          |                   |         |             | 268 | 42889             | +++     | Mutant      |

**Samples not included in microarray analysis**

| Prostate | IGFBP2 expression |         | PTEN status | GBM | IGFBP2 expression |         | PTEN status |
|----------|-------------------|---------|-------------|-----|-------------------|---------|-------------|
|          |                   | Protein |             |     |                   | Protein |             |
| LAPC14   |                   | no      | Wild type   | 64  |                   | no      | Wild type   |
|          |                   |         |             | 103 |                   | no      | Wild type   |
| LAPC3    |                   | +++++   | Mutant      | 125 |                   | no      | Wild type   |
| LAPC12   |                   | ++++    | Mutant      | 155 |                   | no      | Wild type   |
| LuCaP41  |                   | ++      | Mutant      | 208 |                   | no      | Wild type   |
|          |                   |         |             | 305 |                   | no      | Wild type   |
|          |                   |         |             | 429 |                   | +++     | Wild type   |
|          |                   |         |             | 437 |                   | no      | Wild type   |
|          |                   |         |             | 22  |                   | +++++   | Mutant      |
|          |                   |         |             | 127 |                   | ++      | Mutant      |
|          |                   |         |             | 202 |                   | +++     | Mutant      |
